# Supplementary material for: River discharge impacts coastal Southeastern Tropical Atlantic sea surface temperature and circulation: a model-based analysis
Source: Copernicus journal article supplement (doi:10.5194/egusphere-2024-3320), 2024-10-29
Supplement: Supplementary file 1 [file egusphere-2024-3320-supplement.pdf]

*Supplement of*

## **River discharge impacts coastal Southeastern Tropical Atlantic sea surface temperature and circulation: a model-based analysis**

Léo C. Aroucha<sup>1</sup>, Joke F. Lübbecke<sup>1</sup>, Peter Brandt<sup>1,2</sup>, Franziska U. Schwarzkopf<sup>1</sup>, Arne Biastoch<sup>1,2</sup>

5 <sup>1</sup>GEOMAR Helmholtz Centre for Ocean Research Kiel, Kiel, Germany

<sup>2</sup>Faculty of Mathematics and Natural Sciences, Kiel University, Kiel, Germany

*Correspondence to:* Léo C. Aroucha (leo.aroucha@geomar.de)

The copyright of individual parts of the supplement might differ from the article licence.

The content of this file is:

- Supplementary Figures S1 to S7

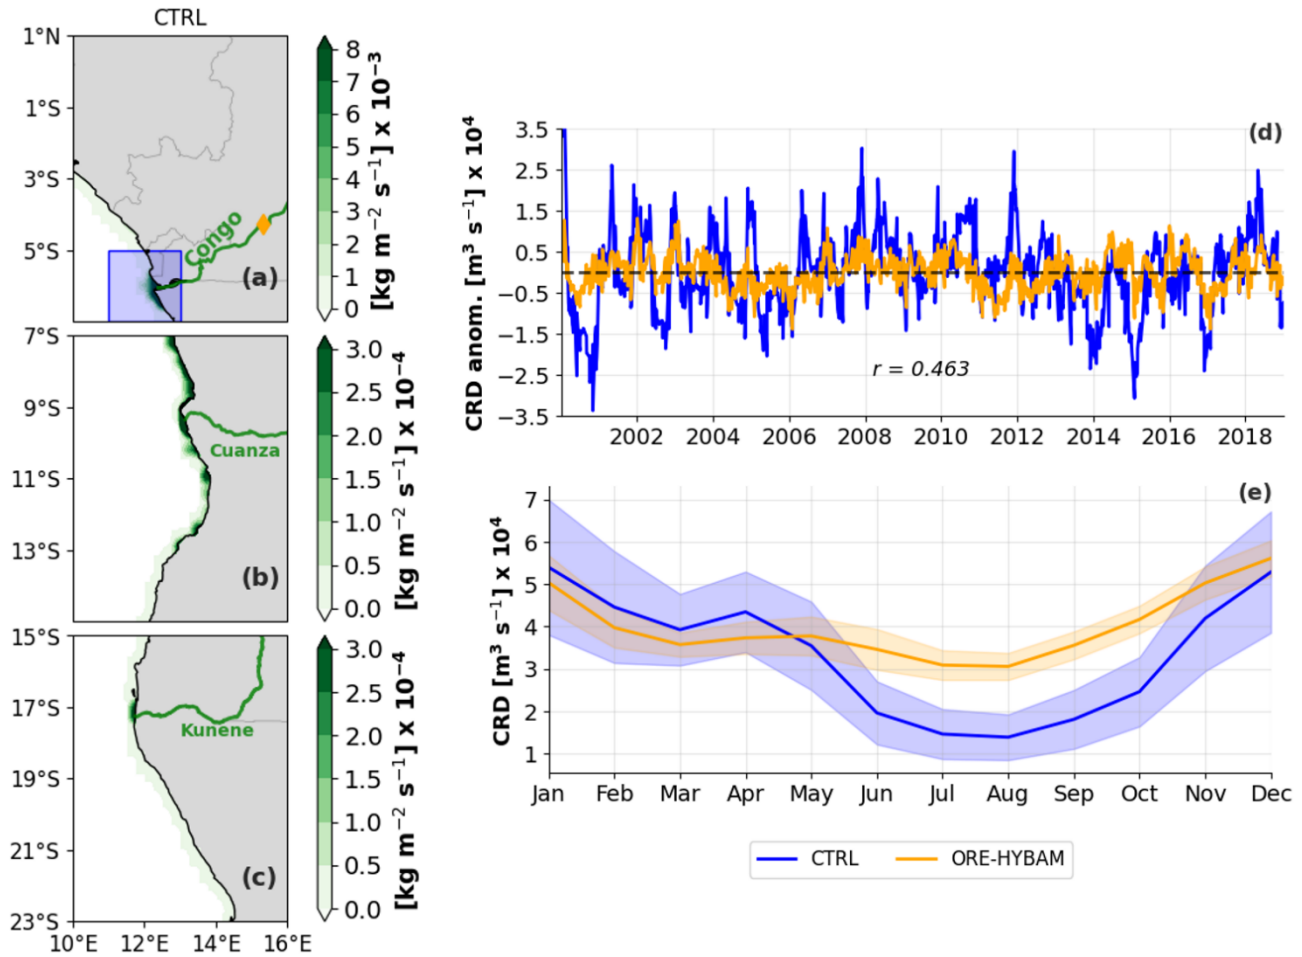

15 **Figure S1.** Freshwater input from CTRL (blue) vs Congo River discharge from Kinshasha-Brazzaville station (orange). **(a)** Freshwater input from CTRL run. Blue box ( $5^{\circ}\text{S} - 7^{\circ}\text{S}$ ,  $11^{\circ}\text{E} - 13^{\circ}\text{E}$ ) in (a) represents the area where CTRL freshwater input was averaged. Orange diamond shows location of Kinshasha-Brazzaville station. **(b)** and **(c)** same as (a). Note that colorbar scales change from (a)-(b). **(d)** Daily anomalies of both box-averaged CTRL freshwater input and ORE-HYBAM river discharge. **(e)** Seasonal climatology from 2000-2018 of both products. Shading in (e) indicates monthly standard deviations.

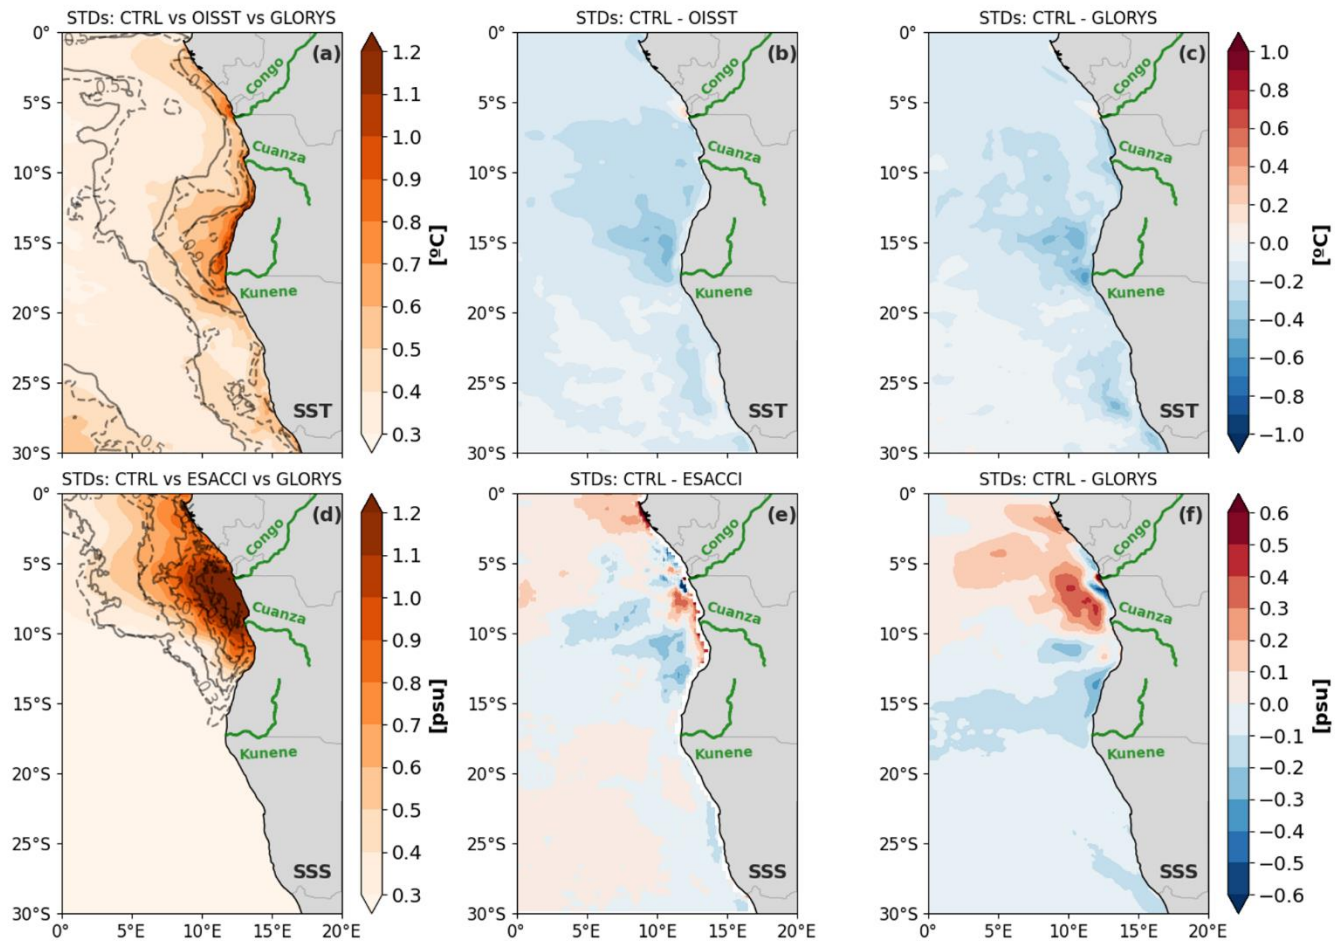

**Figure S2.** Comparison of simulated SST variability against observations and reanalysis. **(a)** Mean SST anomalies monthly standard deviation (STD) from CTRL (shading), OISST (solid contours), and GLORYS (dashed contours) from 2000-2018. **(b)** Mean difference in SST anomalies STD between CTRL and OISST. **(c)** Same as (b) but difference between CTRL and GLORYS12. **(d)** Same as (a) but for CTRL SSS anomalies STD, compared to ESACCI (solid contours, from 2010-2018) and GLORYS12 (dashed contours, 2000-2018). **(e)** Same as (b) but for ESACCI SSS and anomalies from 2010-2018 **(f)** Same as (c) but for SSS.

25

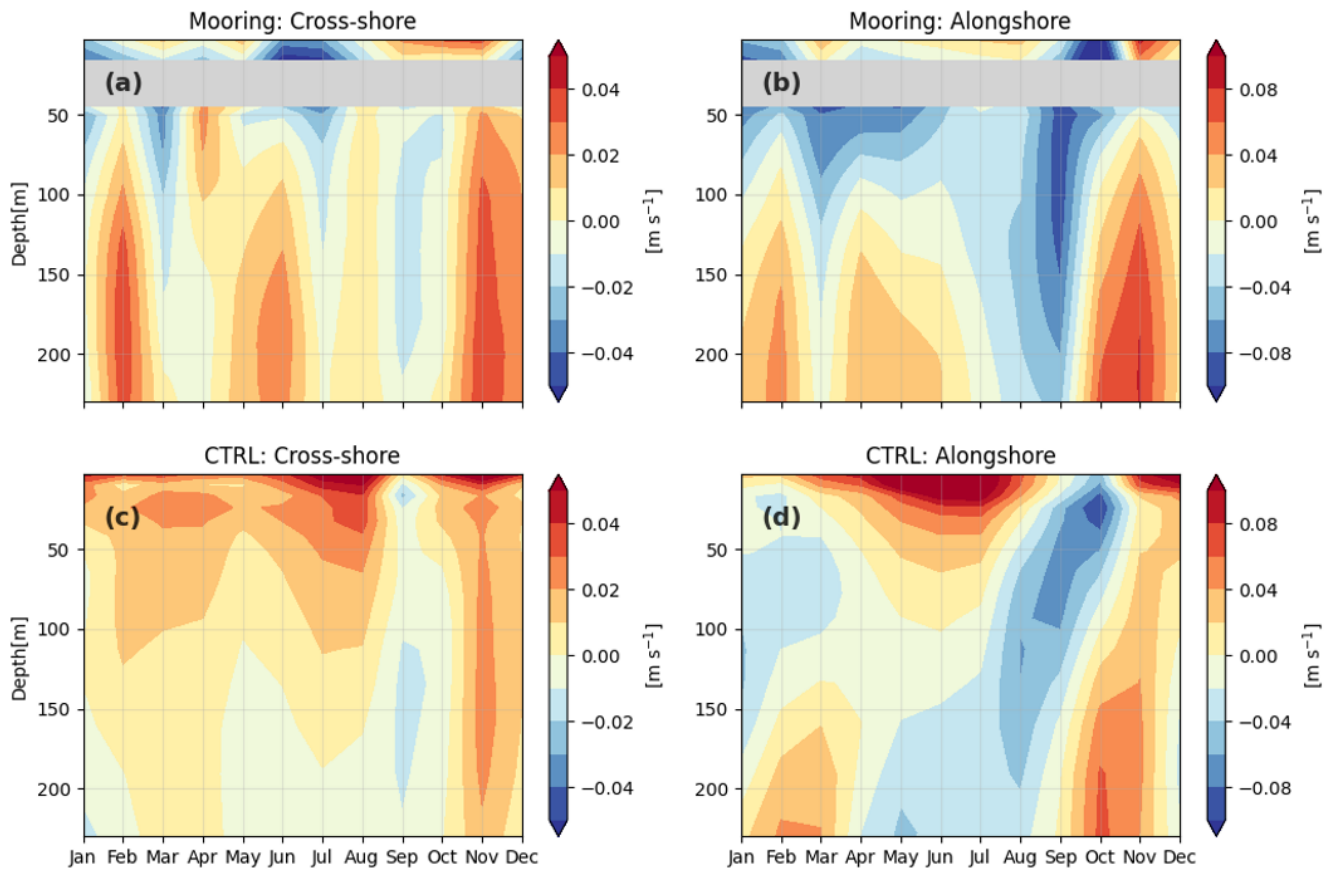

30 **Figure S3.** Cross-shore (**a, c**) and along-shore (**b, d**) current velocity climatology (rotated by  $-34^\circ$  with respect to true north) recorded by the moored ADCP located at  $10^\circ50'S$ ,  $13^\circ00'E$  combined to surface velocities from GLOBCURRENT (**a, b**); and taken from CTRL run (**c, d**) at nearest grid position from mooring location and  $-34^\circ$  rotation. Climatologies were calculated over the period 2014 – 2018.

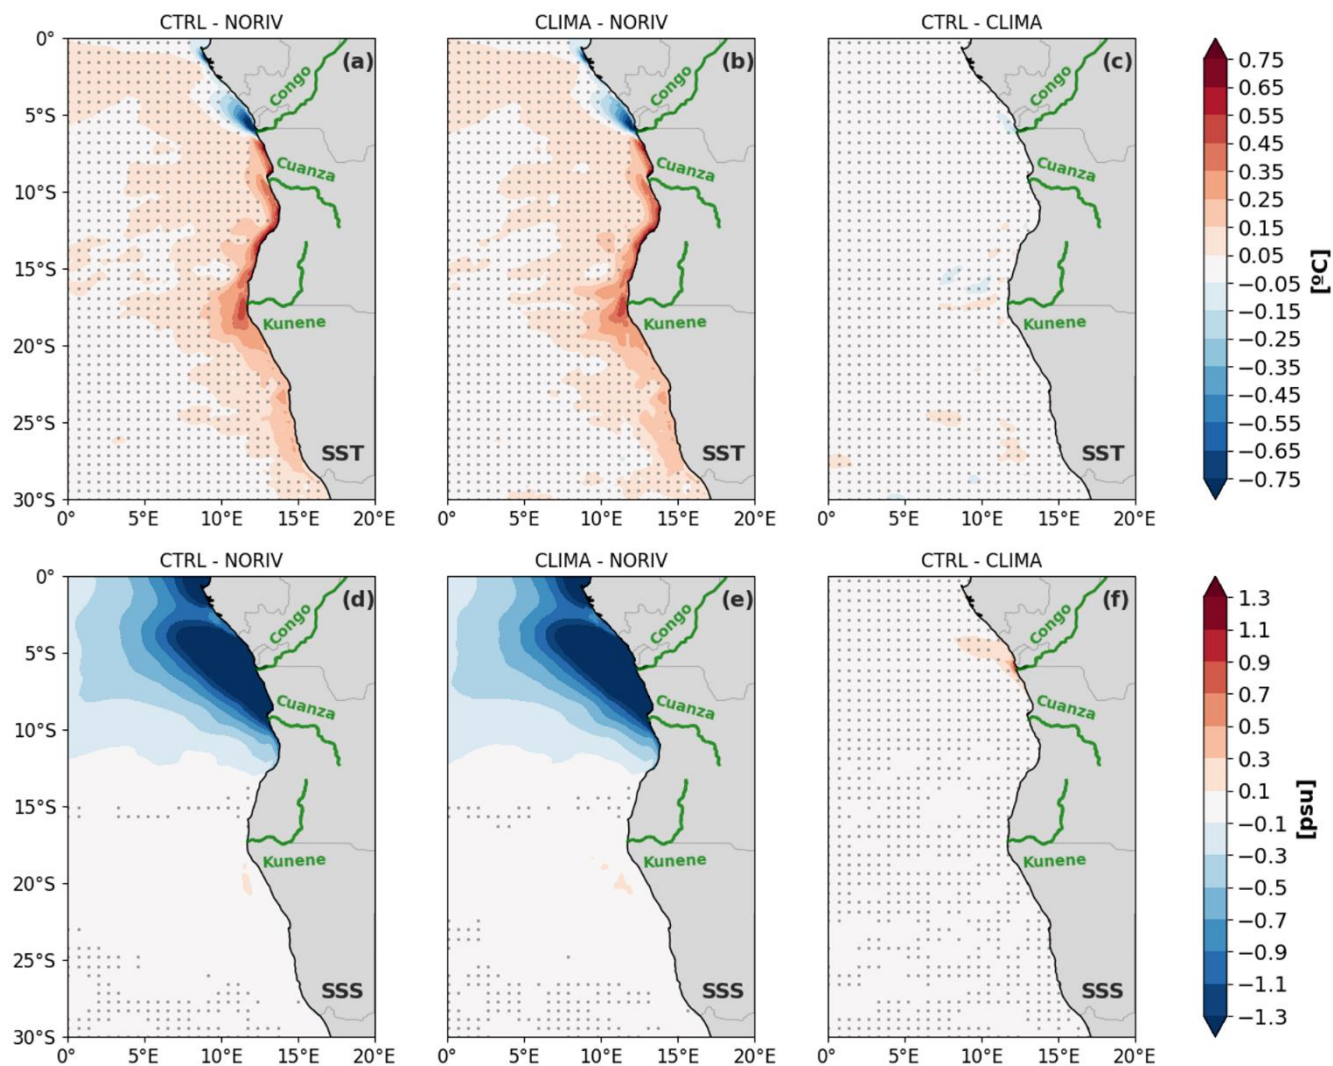

35 **Figure S4.** Mean state difference between runs. **(a)** Mean SST CTRL – Mean SST NORIV. **(b)** Mean SST CLIMA – Mean SST NORIV. **(c)** Mean SST CTRL – Mean SST CLIMA. **(d), (e), (f)** same as (a), (b), (c), respectively, but for SSS. Stippled grey areas indicate where difference is not significant in a 95% confidence level.

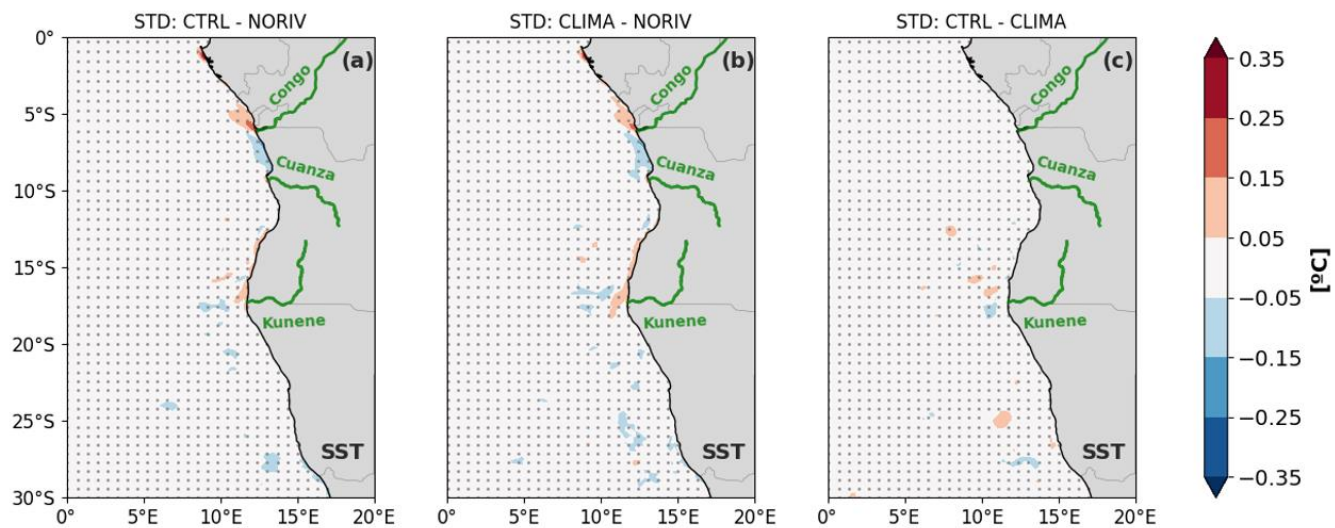

**Figure S5.** Monthly SST anomalies standard deviation (STD) mean difference between runs. **(a)** Mean SST anomalies STD CTRL – Mean SST anomalies STD NORIV **(b)** Mean SST anomalies STD CLIMA – Mean SST anomalies STD NORIV. **(c)** Mean SST anomalies STD CTRL – Mean SST anomalies STD CLIMA. Stippled grey areas indicate where difference is not significant in a 95% confidence level.

40



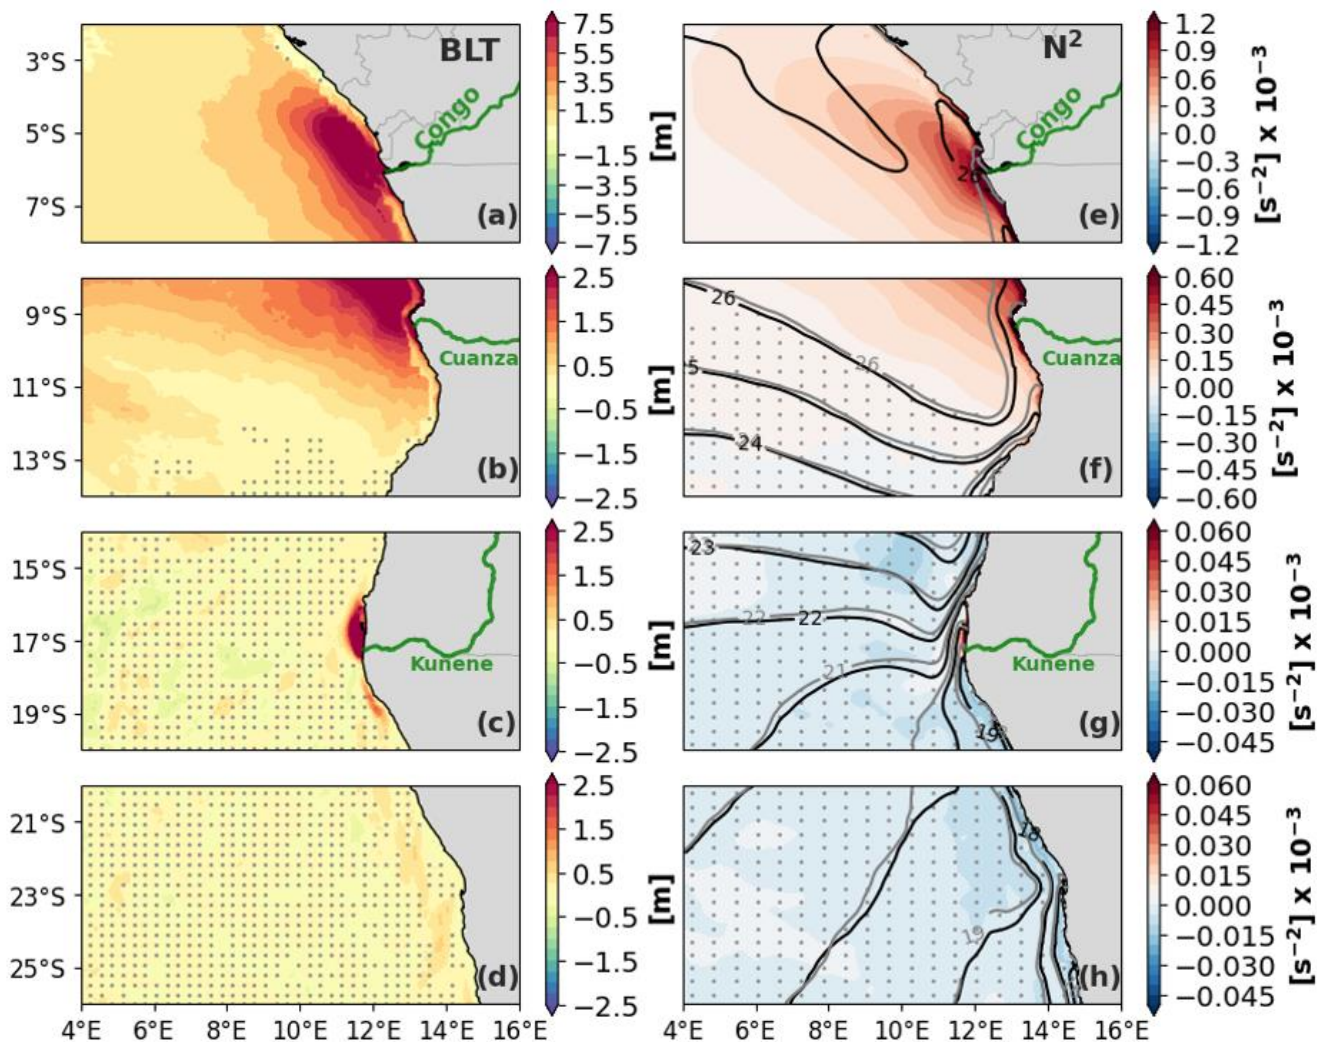

45 **Figure S6.** Difference between CLIMA and NORIV mean states (CLIMA-NORIV) for BLT (a-d);  $N^2$  averaged from surface to 50m depth (e-h). Stippled grey areas indicate where difference is not significant in a 95% confidence level. Black (grey) lines from e-h depicts isotherms from CLIMA (NORIV) run. Note that colorscales change for a (e) in relation to b-d (f-h).

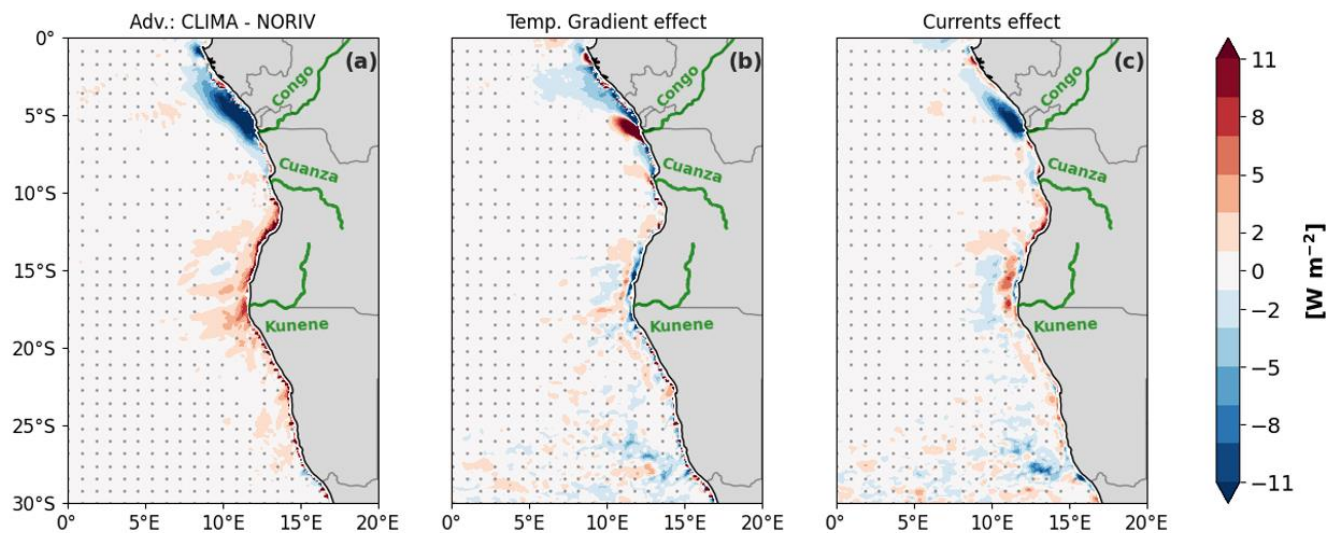

50 **Figure S7.** Difference between CLIMA and NORIV mean states (CLIMA-NORIV) for horizontal advection. In **(a)** both temperature gradient and horizontal currents are from the different runs; in **(b)** only temperature gradient is different (currents from CLIMA); in **(c)** only horizontal current is different (temperature gradient from CLIMA). Stippled grey areas indicate where difference is not significant in a 95% confidence level.
