# Supplementary material for: River discharge impacts coastal Southeastern Tropical Atlantic sea surface temperature and circulation: a model-based analysis
Source: Copernicus journal article supplement (doi:10.5194/egusphere-2024-3320), 2024-10-29
Supplement: Supplementary file [file egusphere-2024-3320-AC1-supplement.pdf]

## RESPONSE TO REVIEWER'S COMMENT (RC1)

for the manuscript “River discharge impacts coastal Southeastern Tropical Atlantic sea surface temperature and circulation: a model-based analysis” by Aroucha et al., submitted to *Ocean Science*.

*We thank the reviewers for their thorough evaluation of our manuscript and their suggestions. Below, we provide a detailed response to all reviewer's queries.*

*To address their comments, we have revised all six figures in the main manuscript and added two new figures to the Supplemental Material. Consequently, the order and numbering of supplementary figures might also have changed. In the “TrackedChanges” file you can see all the modifications made and the “Main” file represents the final revised paper with the changes inserted.*

*References cited in this document are included at the end. Responses to individual comments are provided below, with specific references to the corresponding lines and sections in the revised manuscript. For clarity, our responses are highlighted in blue font throughout this response letter.*

### **Anonymous Referee #1 (RC1)**

Review of “River discharge impacts coastal Southeastern tropical Atlantic sea surface temperature and circulation: a model-based analysis” by Aroucha et al. 2024

The study uses high-resolution model sensitivity experiments to understand the impact of freshwater input on sea surface temperature (SST) variability in the southeastern tropical Atlantic Ocean. Results from model sensitivity runs with climatological freshwater forcing and no freshwater forcing suggest that freshwater-induced SST warming occurs to the south and cooling to the north of the Congo River mouth. The authors propose that freshwater discharge from the Congo River causes halosteric changes in sea surface height, which results in alongshore downwelling circulation and leads to advective SST warming along the coast south of the river mouth. Similarly, the low salinity-induced alongshore circulation to the north of the river mouth is associated with upwelling and cooling of SST. Furthermore, the implications of the southward advection of river water on coastal upwelling are discussed.

This is an important study that highlights the impact of Congo River discharge and low salinity on coastal ocean circulation dynamics, SST variability, and coastal upwelling. The paper is well-organized, with good-quality figures. The manuscript may be considered for publication after the authors have addressed the major and minor comments listed below.

### **Major comments:**

1. Figures 1 and 2: While I appreciate the thorough validation of the model data with in situ observations and the reanalysis dataset, the timeseries plots in both figures appear very

cluttered, and the different colored curves are difficult to distinguish. My suggestion would be to remove the 'NO RIV' and 'CLIM' curves from these figures and make a new figure with SST and SSS from CTL, NO RIV and CLIM runs, if possible.

R. Thank you for pointing this out. We removed from both Figures 1(d-e) and 2(d-g) the NORIV and CLIM curves. Now Figures 1 and 2 depict only the difference between the reanalysis and satellite products for both SST and SSS, respectively, compared to the CTRL run. We also added new Figures S2 and S3 with the curves for the three simulations (CTRL, CLIMA, and NORIV) for a better comparison among them. Please find the new figures in the Supplemental Material.

2. Figure 3: The velocity vectors are not clearly visible in panels i-l. Is it possible to increase the arrow length? According to the proposed mechanism (Fig. 6), one would expect to see negative SSH differences to the north of the Congo River mouth which depicts upwelling associated with advective low SST values. But Fig. 3(i) shows positive SSH values all along the coast. Can this be explained?

R. First, thanks for pointing out this issue in Figure 3. We now increased the arrow length and size in Figure 3(i-l) for a better visualization. Please note that the vector scale also changed. Second, thanks as well for your question. The proposed mechanism in Figure 6 describes a primary meridional pressure gradient north and south of the river mouth, which means that the SSH increase directly at the river mouth is higher than north and south of it. However, since these changes refer to differences between runs with and without the river discharge, the SSH difference around the river will always be positive. Due to the spatial difference in the SSH magnitude shift from one experiment to the other (CLIMA – NORIV), the pressure gradients responsible for changing the coastal dynamics are present. Please see below Figure R1, depicting a primary negative meridional pressure gradient north of the river mouth and a positive meridional pressure gradient south of it. Although there are these pressure gradients from the Congo mouth toward north and south, all SSH values are positive (see inverted x-axis in Figure R1).

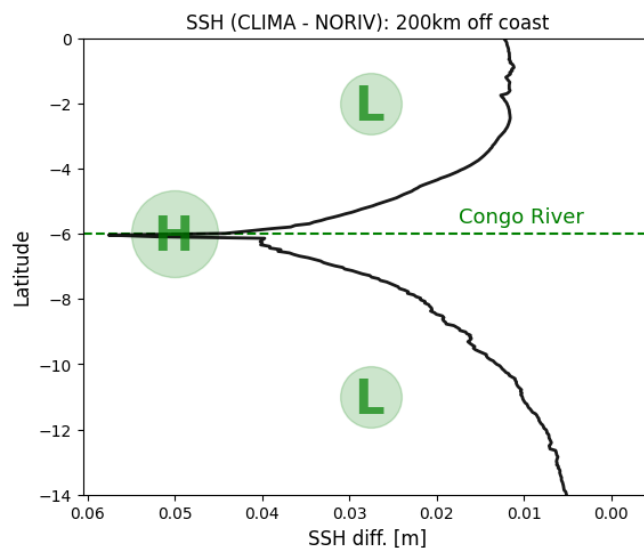

**Figure R1** SSH differences between CLIMA and NORIV mean states (CLIMA-NORIV). Mean 200km off coast (x-axis inverted). H stands for higher pressure and L for lower pressure.

3. It is surprising to see that there is no difference in SSS between the CTL and CLIM runs. Interannual variability in SSS is known to be tightly linked to the interannual variability in Congo River discharge. However, the model discharge does not seem to align well with the observed discharge values at the Kinshasa station (Fig. S1). Do you think the discrepancies in model runoff forcing could be a possible reason for this?

R. Thank you for the question. Yes, the discrepancies between model runoff forcing and the Brazzaville station could be a reason for the almost identical SSS interannual variability between CTRL and CLIM. These discrepancies have been attributed to the complex hydrology and the lack of observational data in the Congo basin (Chandanpurkar et al., 2022; Hua et al., 2019). In fact, Chandanpurkar et al. (2022) argue that the bi-modal rainfall distribution over this river basin due to the poorly understood thick rainforest interaction with hydrology combined with the seasonal shift of the Intertropical Convergence Zone are some reasons for such differences in the discharge. This then limits the JRA55 atmospheric reanalysis performance over the Congo basin. We discuss this point in Sect. 4 “Conclusions and discussion”, from L.517 to L.522.

4. Are these linear regression plots and reported correlation values calculated at zero lag? I would expect there to be a lag of 1-2 months between the SSS at the Congo River mouth and the SSH/SST in the coastal Angola-Benguela area, as it takes time for the river water to be advected south along the coast. Can you check this by plotting lagged correlation between the variables?

R. Thank you for your question. Yes, the linear regression plots and correlation values are at zero lag. Please see below Figure R2 with the lagged correlation between the variables presented in Figure 4 of the paper. In fact, the highest correlation values observed are at zero correlation lag (Figure R2). Indeed, considering a particle from the Congo's mouth at 6°S being transported to the south by a southward coastal current of 0.2m/s (Fig. 3), this particle would be advected around 4-5 degrees of latitude, reaching ~10° - 11°S within a month, which agrees with our zero-lag correlation between an SSH change at Congo's mouth and an SST change at Angola-Namibia coast. It is important to note that interpreting a lag correlation of the differences between the two experiments is not straightforward, as the processes evolve differently in each simulation also because of different mean states. Therefore, it is challenging to determine a specific timescale for linking the processes shown in Figure 3. Still, the linear regression indicates that changes in SSS and SSH due to the freshwater input are simultaneously associated with an advection response and consequently a change in SST.

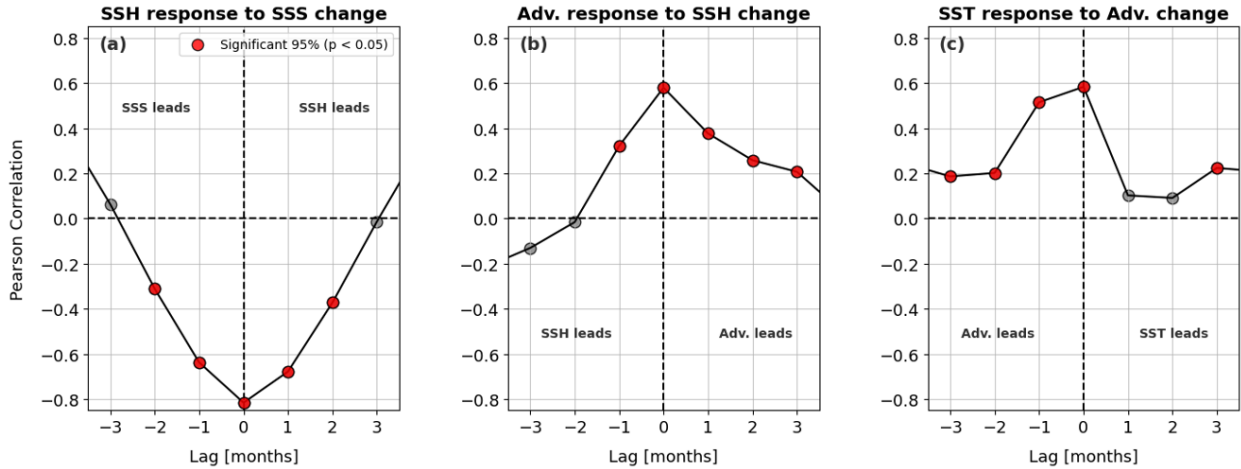

**Figure R2** -Ocean response to land-to-ocean discharge (lead-lag correlations). (a) Linear regression of monthly SSS differences upon monthly SSH differences (CLIMA – NORIV) averaged for CRMA. (b) Linear regression of monthly SSH differences upon monthly advection differences (CLIMA – NORIV) averaged for CRMA and CABA, respectively. (c) Linear regression of monthly advection differences upon monthly SST differences (CLIMA – NORIV) averaged for CABA area.

5. Fig. 4: It might be useful to add a panel showing the linear regression plot between SSS in CRMA and SST in CABA.

R. Thank you for your suggestion. We show this regression below (Fig. R3c) but did not add the panel in the manuscript since the correlation is not significant. Since there are several processes involved in this SST change associated with a SSS change (e.g. halosteric effect of increasing SSH, changing mixed layer depth and mixed layer heat budget, coastal current generation, advection, etc.) we believe that showing the step-by-step correlation for each process highlights and delineates in a better way the processes related to a freshwater input impact on the SST changes at the southwestern African coastal fringe than the direct regression of SSS change at CRMA to CABA SST shifts. Still, the CABA SST response to SSH change at CRMA (Fig. R3a) and CABA advection response to the SSS change at CRMA (Fig. R3b) are significantly correlated.

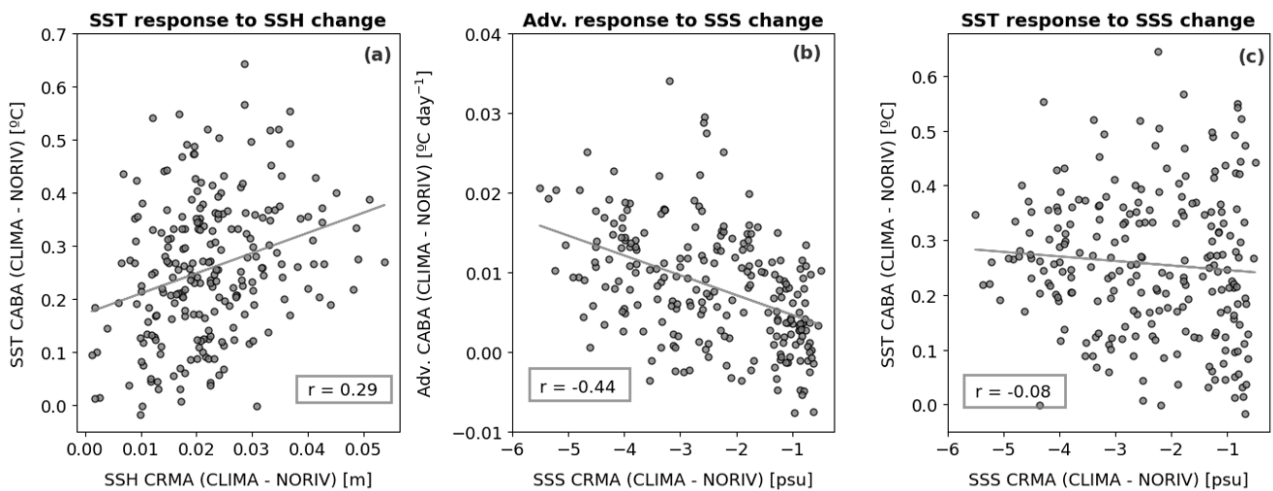

**Figure R3** -Ocean response to land-to-ocean discharge. (a) Linear regression of monthly SSH differences upon monthly SST differences (CLIMA – NORIV) averaged for CRMA. (b) Linear regression of monthly SSS differences upon monthly advection differences (CLIMA – NORIV) averaged for CRMA and CABA, respectively. (c) Linear regression of monthly SSS differences upon monthly SST differences (CLIMA – NORIV) averaged for CABA area.

6. Would it be possible to show the horizontal advection in °C/day instead of W/m<sup>2</sup> for easier comparison with the SST plots?

R. Thank you for the suggestion! Yes, it would be possible. The horizontal advection term is now in units of °C/day in all plots (please see Figs. 3, 4 and S9). For this, we also needed to change Eq. 4 in Section 2.4, L.171, since the units are now independent of the seawater density, specific heat capacity and mixed-layer depth.

7. Fig. 5 shows that the Ekman upwelling index contributes significantly more to coastal upwelling than the Geostrophic upwelling index. Additionally, there is little difference between the CLIM and NO RIV runs for the ECUI. This figure does not seem to add much to the discussion and could be moved to the supplementary material. Instead, I recommend moving Fig. S7 to the main article, as it illustrates the contribution of geostrophic currents to horizontal temperature advection. This is just a suggestion; ultimately, it is up to the authors to decide.

R. Thank you for your suggestion! Indeed, the ECUI does not significantly change from one simulation to the other. This is explained since the atmospheric forcing is the same for both runs. However, the purpose of this figure is to depict changes specifically in the geostrophic upwelling around the Congo's mouth. Although the ECUI dominates the coastal upwelling in relation to the GCUI, we believe that the significant shift in GCUI in the simulations including the river discharge is of great importance. The downwelling and upwelling south and north of 6°S, respectively, associated with a change in the geostrophic coastal currents due to the freshwater input explain the observed coastal SST difference from 6°S to 11°S. This shift in GCUI also contributes significantly to changing the total upwelling around the Congo's mouth. Therefore, we opted to keep Fig.5 in the manuscript, though we appreciate your suggestion.

#### Minor comments:

1. There are too many acronyms (e.g., SETA, CTW, CRMA, CABA, CUI, ECUI, GCUI, etc.), which can make it difficult for the reader to follow. Please consider reducing the number of acronyms to improve clarity and simplicity.

R. Thanks for pointing that out. We removed the acronyms for CUI (total upwelling indice), AC (Angola Current), CTW (Coastally Trapped Waves), and EBUS (Eastern Boundary Upwelling Systems). Please see these changes throughout the text. Unfortunately, we believe some acronyms are still necessary to define a specific area (e.g. CRMA, CABA) or index (GCUI, ECUI). Still, we hope these changes can already improve clarity for the reader.

2. Line 10: Suggest adding "significant" freshwater input from land.

R. Thank you for the suggestion. The term is now added in L.10 in the Abstract.

3. Lines 31-32: Please mention the longitude of the mouth of the rivers as well.

R. Thank you for observing this. The river's mouth both latitudes and longitudes are now included in the text in L.34.

4. Line 174: Why were the horizontal advection values within 20 km distance neglected? Is it

because of large errors? Add a sentence explaining that.

R. Thanks for the question. Yes, the horizontal advection values within the 20km distance to the coast are neglected due to the large error close to the coast associated with the horizontal temperature gradient calculation. Please see below Fig. R4. how it looks without neglecting the 20km off the coast. We have now included an explaining sentence in Section 2.4 at the main text in L.175.

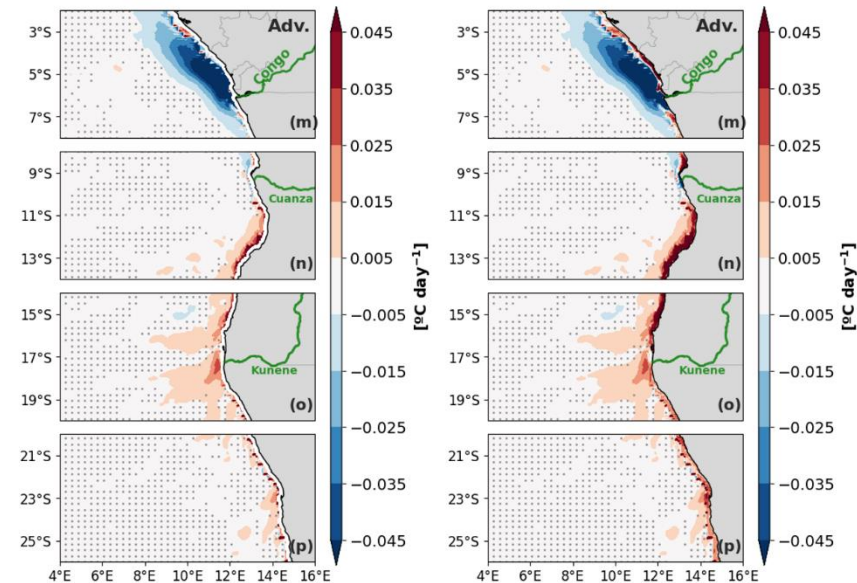

**Figure R4** - Differences between CLIMA and NORIV mean states (CLIMA-NORIV) for Horizontal Advection (m-p) neglecting the values 20km off the coast (left) and including those values (right). Stippled grey areas indicate where the difference is not significant in a 95% confidence level.

5. Line 249-250: It is not clear what weak SSS variability in CTL run means here. I see significant variability in CTL run SSS in Fig. 2d.

R. Thank you for the comment. Indeed, the CTRL SSS variability is significant, as shown in Figure 2d. However, here we meant that the CTRL SSS variability in Coastal Angola-Benguela Area (CABA) is weaker than the SSS variability observed in both satellite (ESACCI) and reanalysis (GLORYS) products (new Fig. S4d-f). We added this information to the sentence from L.259 to L.263; hopefully, it reads better now.

6. Fig. 6: You might want to say what the blue dotted arrow represents in the right-side graphic legend.

R. Thanks for pointing this out. The blue dotted arrow also represents a geostrophic current related to the primary pressure gradient. We have now included this information in the legend of Fig. 6.

7. Line 439: The negative values of GCU seem to extend from 17S to 6S.

R. Thanks for catching this. Indeed, the values extend to 6°S. We replaced “17°S to 10°S” by “17°S to 6°S”, and it can be found in L.447.

### **References cited in this document**

Chandanpurkar, H. A., Lee, T., Wang, X., Zhang, H., Fournier, S., Fenty, I., Fukumori, I., Menemenlis, D., Piecuch, C. G., Reager, J. T., Wang, O., and Worden, J.: Influence of Nonseasonal River Discharge on Sea Surface Salinity and Height, *J Adv Model Earth Syst*, 14, e2021MS002715, <https://doi.org/10.1029/2021MS002715>, 2022.

Hua, W., Zhou, L., Nicholson, S. E., Chen, H., and Qin, M.: Assessing reanalysis data for understanding rainfall climatology and variability over Central Equatorial Africa, *Clim Dyn*, 53, 651–669, <https://doi.org/10.1007/s00382-018-04604-0>, 2019.
